# Supplementary material for: Low Cost and Flexible UAV Deployment of Sensors
Source: Sensors (Basel). 2017 Jan 14;17(1):154. doi: 10.3390/s17010154 (PMC5298727; doi:10.3390/s17010154)
Supplement: Supplementary File 1 [file sensors-17-00154-s001.txt]

_id	latitude	longitude	altitudeInCm	usecsSince1970	value	Time (human readable)
596	55.4865013	12.1696014	139.0	1466775089240000	0	Fri Jun 24 15:31:29 GMT+02:00 2016
597	55.4865013	12.1696014	139.0	1466775089240000	0	Fri Jun 24 15:31:29 GMT+02:00 2016
598	55.4864986	12.1695981	97.0	1466775095240000	0	Fri Jun 24 15:31:35 GMT+02:00 2016
599	55.4864986	12.1695952	74.0	1466775101240000	0	Fri Jun 24 15:31:41 GMT+02:00 2016
600	55.4865	12.1695971	119.0	1466775107240000	0	Fri Jun 24 15:31:47 GMT+02:00 2016
601	55.4864981	12.1696031	132.0	1466775113240000	0	Fri Jun 24 15:31:53 GMT+02:00 2016
602	55.4864952	12.1696028	93.0	1466775119240000	0	Fri Jun 24 15:31:59 GMT+02:00 2016
603	55.4864907	12.1695985	-5.0	1466775125240000	0	Fri Jun 24 15:32:05 GMT+02:00 2016
604	55.4864919	12.1696	7.0	1466775131200000	0	Fri Jun 24 15:32:11 GMT+02:00 2016
605	55.4864935	12.1696048	68.0	1466775137241000	0	Fri Jun 24 15:32:17 GMT+02:00 2016
606	55.4864955	12.1696106	153.0	1466775143240000	0	Fri Jun 24 15:32:23 GMT+02:00 2016
607	55.4864972	12.1696088	88.0	1466775149240000	0	Fri Jun 24 15:32:29 GMT+02:00 2016
608	55.4864967	12.1696034	22.0	1466775155240000	0	Fri Jun 24 15:32:35 GMT+02:00 2016
609	55.486499	12.1696011	4.0	1466775161240000	0	Fri Jun 24 15:32:41 GMT+02:00 2016
610	55.4865039	12.1695992	74.0	1466775167240000	0	Fri Jun 24 15:32:47 GMT+02:00 2016
611	55.4865026	12.1695978	112.0	1466775173240000	0	Fri Jun 24 15:32:53 GMT+02:00 2016
612	55.4864995	12.1695982	99.0	1466775179240000	0	Fri Jun 24 15:32:59 GMT+02:00 2016
613	55.4864958	12.1695975	79.0	1466775187101000	0	Fri Jun 24 15:33:07 GMT+02:00 2016
614	55.4865241	12.1695807	566.0	1466775193121000	0	Fri Jun 24 15:33:13 GMT+02:00 2016
615	55.4866174	12.1694714	510.0	1466775199101000	21	Fri Jun 24 15:33:19 GMT+02:00 2016
616	55.486711	12.1693773	559.0	1466775205101000	17	Fri Jun 24 15:33:25 GMT+02:00 2016
617	55.4868037	12.1692884	461.0	1466775211101000	27	Fri Jun 24 15:33:31 GMT+02:00 2016
618	55.486894	12.1691981	467.0	1466775217101000	35	Fri Jun 24 15:33:37 GMT+02:00 2016
619	55.4868148	12.1691965	435.0	1466775223101000	34	Fri Jun 24 15:33:43 GMT+02:00 2016
620	55.4867225	12.1692134	438.0	1466775229101000	26	Fri Jun 24 15:33:49 GMT+02:00 2016
621	55.4866251	12.1692196	559.0	1466775235101000	17	Fri Jun 24 15:33:55 GMT+02:00 2016
622	55.4865278	12.1692253	592.0	1466775241101000	12	Fri Jun 24 15:34:01 GMT+02:00 2016
623	55.4864346	12.1692306	491.0	1466775247101000	0	Fri Jun 24 15:34:07 GMT+02:00 2016
624	55.4863341	12.1692372	443.0	1466775253101000	0	Fri Jun 24 15:34:13 GMT+02:00 2016
625	55.4862323	12.1692424	457.0	1466775259101000	0	Fri Jun 24 15:34:19 GMT+02:00 2016
626	55.4861467	12.1692488	386.0	1466775265101000	0	Fri Jun 24 15:34:25 GMT+02:00 2016
627	55.4861187	12.1693656	362.0	1466775271101000	0	Fri Jun 24 15:34:31 GMT+02:00 2016
628	55.4861315	12.1695272	373.0	1466775277121000	0	Fri Jun 24 15:34:37 GMT+02:00 2016
629	55.4861408	12.1697018	448.0	1466775283101000	9	Fri Jun 24 15:34:43 GMT+02:00 2016
630	55.48615	12.1698772	398.0	1466775289101000	19	Fri Jun 24 15:34:49 GMT+02:00 2016
631	55.4862052	12.1699776	447.0	1466775295100000	27	Fri Jun 24 15:34:55 GMT+02:00 2016
632	55.486307	12.169984	510.0	1466775301100000	44	Fri Jun 24 15:35:01 GMT+02:00 2016
633	55.4864142	12.1699979	560.0	1466775307101000	31	Fri Jun 24 15:35:07 GMT+02:00 2016
634	55.486519	12.1700087	503.0	1466775313101000	22	Fri Jun 24 15:35:13 GMT+02:00 2016
635	55.486624	12.1700245	400.0	1466775319101000	14	Fri Jun 24 15:35:19 GMT+02:00 2016
636	55.48673	12.1700338	419.0	1466775325101000	11	Fri Jun 24 15:35:25 GMT+02:00 2016
637	55.4868325	12.1700495	438.0	1466775331100000	9	Fri Jun 24 15:35:31 GMT+02:00 2016
638	55.486887	12.1699548	479.0	1466775337121000	11	Fri Jun 24 15:35:37 GMT+02:00 2016
639	55.4868913	12.1697911	449.0	1466775343100000	13	Fri Jun 24 15:35:43 GMT+02:00 2016
640	55.4868933	12.1696282	456.0	1466775349100000	17	Fri Jun 24 15:35:49 GMT+02:00 2016
641	55.4868988	12.1694451	422.0	1466775355100000	23	Fri Jun 24 15:35:55 GMT+02:00 2016
642	55.4868742	12.1693273	437.0	1466775361100000	35	Fri Jun 24 15:36:01 GMT+02:00 2016
643	55.4867803	12.1693307	478.0	1466775367100000	28	Fri Jun 24 15:36:07 GMT+02:00 2016
644	55.4866861	12.1693358	469.0	1466775373100000	32	Fri Jun 24 15:36:13 GMT+02:00 2016
645	55.4865915	12.169346	481.0	1466775379100000	30	Fri Jun 24 15:36:19 GMT+02:00 2016
646	55.4865023	12.169353	420.0	1466775385100000	10	Fri Jun 24 15:36:25 GMT+02:00 2016
647	55.486409	12.1693558	513.0	1466775391100000	11	Fri Jun 24 15:36:31 GMT+02:00 2016
648	55.4863133	12.1693627	492.0	1466775397100000	0	Fri Jun 24 15:36:37 GMT+02:00 2016
649	55.486203	12.1695039	360.0	1466775409100000	0	Fri Jun 24 15:36:49 GMT+02:00 2016
650	55.4862106	12.1696664	409.0	1466775415100000	11	Fri Jun 24 15:36:55 GMT+02:00 2016
651	55.4862173	12.1698321	455.0	1466775421100000	12	Fri Jun 24 15:37:01 GMT+02:00 2016
652	55.4863143	12.1698612	466.0	1466775427100000	32	Fri Jun 24 15:37:07 GMT+02:00 2016
653	55.4864167	12.1698726	423.0	1466775433100000	32	Fri Jun 24 15:37:13 GMT+02:00 2016
654	55.4865249	12.169884	444.0	1466775439100000	0	Fri Jun 24 15:37:19 GMT+02:00 2016
655	55.4866244	12.1698957	441.0	1466775445100000	0	Fri Jun 24 15:37:25 GMT+02:00 2016
656	55.4867292	12.16991	440.0	1466775451100000	0	Fri Jun 24 15:37:31 GMT+02:00 2016
657	55.486811	12.1698853	388.0	1466775457101000	13	Fri Jun 24 15:37:37 GMT+02:00 2016
658	55.4868181	12.1697117	325.0	1466775463100000	17	Fri Jun 24 15:37:43 GMT+02:00 2016
659	55.4868226	12.169546	446.0	1466775469100000	19	Fri Jun 24 15:37:49 GMT+02:00 2016
660	55.4867812	12.1694572	483.0	1466775475100000	28	Fri Jun 24 15:37:55 GMT+02:00 2016
661	55.4866894	12.1694651	520.0	1466775481100000	20	Fri Jun 24 15:38:01 GMT+02:00 2016
662	55.4865969	12.1694697	580.0	1466775487100000	17	Fri Jun 24 15:38:07 GMT+02:00 2016
663	55.4865043	12.1694778	560.0	1466775493100000	11	Fri Jun 24 15:38:13 GMT+02:00 2016
664	55.4864148	12.1694836	496.0	1466775499100000	0	Fri Jun 24 15:38:19 GMT+02:00 2016
665	55.4863217	12.1694897	538.0	1466775505100000	0	Fri Jun 24 15:38:25 GMT+02:00 2016
666	55.4862772	12.1695866	469.0	1466775511100000	0	Fri Jun 24 15:38:31 GMT+02:00 2016
667	55.4863059	12.1697281	505.0	1466775517101000	0	Fri Jun 24 15:38:37 GMT+02:00 2016
668	55.4864081	12.1697448	477.0	1466775523100000	0	Fri Jun 24 15:38:43 GMT+02:00 2016
669	55.4865105	12.1697588	421.0	1466775529100000	0	Fri Jun 24 15:38:49 GMT+02:00 2016
670	55.486617	12.1697697	475.0	1466775535100000	0	Fri Jun 24 15:38:55 GMT+02:00 2016
671	55.4867178	12.16978	447.0	1466775541100000	0	Fri Jun 24 15:39:01 GMT+02:00 2016
672	55.486749	12.169648	416.0	1466775547100000	11	Fri Jun 24 15:39:07 GMT+02:00 2016
673	55.4866846	12.1695916	434.0	1466775553100000	11	Fri Jun 24 15:39:13 GMT+02:00 2016
674	55.4865922	12.1695975	418.0	1466775559100000	10	Fri Jun 24 15:39:19 GMT+02:00 2016
675	55.4865017	12.1696008	396.0	1466775565100000	0	Fri Jun 24 15:39:25 GMT+02:00 2016
676	55.4864129	12.1696078	364.0	1466775571080000	0	Fri Jun 24 15:39:31 GMT+02:00 2016
677	55.4863805	12.1696167	426.0	1466775577101000	0	Fri Jun 24 15:39:37 GMT+02:00 2016
678	55.4864814	12.1696257	507.0	1466775583080000	0	Fri Jun 24 15:39:43 GMT+02:00 2016
679	55.4865882	12.1696411	538.0	1466775589100000	0	Fri Jun 24 15:39:49 GMT+02:00 2016
680	55.4866723	12.1696122	527.0	1466775595101000	9	Fri Jun 24 15:39:55 GMT+02:00 2016
681	55.4866793	12.1695934	1473.0	1466775601101000	13	Fri Jun 24 15:40:01 GMT+02:00 2016
682	55.4865479	12.1695995	2030.0	1466775613101000	10	Fri Jun 24 15:40:13 GMT+02:00 2016
683	55.4864998	12.1696004	1987.0	1466775619101000	0	Fri Jun 24 15:40:19 GMT+02:00 2016
684	55.4865023	12.1696016	1355.0	1466775625101000	0	Fri Jun 24 15:40:25 GMT+02:00 2016
685	55.4865024	12.1696003	614.0	1466775631101000	0	Fri Jun 24 15:40:31 GMT+02:00 2016
686	55.4865014	12.169601	483.0	1466775637101000	0	Fri Jun 24 15:40:37 GMT+02:00 2016
687	55.4865035	12.1696027	115.0	1466775643081000	0	Fri Jun 24 15:40:43 GMT+02:00 2016
688	55.4865031	12.1696	22.0	1466775649101000	0	Fri Jun 24 15:40:49 GMT+02:00 2016
689	55.4865015	12.1695997	58.0	1466775655081000	0	Fri Jun 24 15:40:55 GMT+02:00 2016
690	55.4865003	12.1696016	104.0	1466775661100000	0	Fri Jun 24 15:41:01 GMT+02:00 2016
691	55.4865005	12.1695995	115.0	1466775667100000	0	Fri Jun 24 15:41:07 GMT+02:00 2016
692	55.4864973	12.1695973	-24.0	1466775673100000	0	Fri Jun 24 15:41:13 GMT+02:00 2016
693	55.4865005	12.1695945	24.0	1466775679080000	0	Fri Jun 24 15:41:19 GMT+02:00 2016
694	55.4865015	12.1695992	76.0	1466775685081000	0	Fri Jun 24 15:41:25 GMT+02:00 2016
695	55.4865027	12.1695988	111.0	1466775691081000	0	Fri Jun 24 15:41:31 GMT+02:00 2016
696	55.4865009	12.1695978	111.0	1466775697081000	0	Fri Jun 24 15:41:37 GMT+02:00 2016
697	55.4864973	12.1696025	67.0	1466775703080000	0	Fri Jun 24 15:41:43 GMT+02:00 2016
698	55.4864972	12.1696015	20.0	1466775709101000	0	Fri Jun 24 15:41:49 GMT+02:00 2016
699	55.4864994	12.1696031	70.0	1466775715080000	0	Fri Jun 24 15:41:55 GMT+02:00 2016
700	55.4865021	12.1696024	51.0	1466775721080000	0	Fri Jun 24 15:42:01 GMT+02:00 2016
701	55.4865039	12.1695992	99.0	1466775727080000	0	Fri Jun 24 15:42:07 GMT+02:00 2016
702	55.4864983	12.1695974	28.0	1466775733100000	0	Fri Jun 24 15:42:13 GMT+02:00 2016
703	55.4864984	12.1695957	61.0	1466775739080000	0	Fri Jun 24 15:42:19 GMT+02:00 2016
704	55.4864989	12.169596	87.0	1466775745080000	0	Fri Jun 24 15:42:25 GMT+02:00 2016
705	55.4864991	12.1696011	76.0	1466775751100000	0	Fri Jun 24 15:42:31 GMT+02:00 2016
706	55.4864979	12.169598	-16.0	1466775757081000	0	Fri Jun 24 15:42:37 GMT+02:00 2016
707	55.4864962	12.1695991	-32.0	1466775763080000	0	Fri Jun 24 15:42:43 GMT+02:00 2016
708	55.4864981	12.1696025	36.0	1466775769080000	0	Fri Jun 24 15:42:49 GMT+02:00 2016
709	55.4865029	12.1696061	75.0	1466775775080000	0	Fri Jun 24 15:42:55 GMT+02:00 2016
710	55.4865025	12.1696044	134.0	1466775781080000	0	Fri Jun 24 15:43:01 GMT+02:00 2016
711	55.4865025	12.1696031	133.0	1466775787080000	0	Fri Jun 24 15:43:07 GMT+02:00 2016
712	55.4865011	12.1696021	82.0	1466775793080000	0	Fri Jun 24 15:43:13 GMT+02:00 2016
713	55.4865031	12.1696033	55.0	1466775799080000	0	Fri Jun 24 15:43:19 GMT+02:00 2016
714	55.4865047	12.1696079	61.0	1466775805080000	0	Fri Jun 24 15:43:25 GMT+02:00 2016
715	55.4865016	12.1696049	70.0	1466775811081000	33	Fri Jun 24 15:43:31 GMT+02:00 2016
716	55.4865013	12.1696034	89.0	1466775817081000	29	Fri Jun 24 15:43:37 GMT+02:00 2016
717	55.4865018	12.1696087	93.0	1466775823081000	27	Fri Jun 24 15:43:43 GMT+02:00 2016
718	55.4865002	12.1696062	107.0	1466775829080000	32	Fri Jun 24 15:43:49 GMT+02:00 2016
719	55.4864992	12.1696005	62.0	1466775835080000	31	Fri Jun 24 15:43:55 GMT+02:00 2016
720	55.486501	12.1695979	12.0	1466775841081000	31	Fri Jun 24 15:44:01 GMT+02:00 2016
721	55.4864975	12.1695963	-18.0	1466775847080000	28	Fri Jun 24 15:44:07 GMT+02:00 2016
722	55.4864982	12.1695998	46.0	1466775853080000	26	Fri Jun 24 15:44:13 GMT+02:00 2016
723	55.4865013	12.1696023	85.0	1466775859080000	0	Fri Jun 24 15:44:19 GMT+02:00 2016
724	55.4864998	12.1695952	62.0	1466775865080000	0	Fri Jun 24 15:44:25 GMT+02:00 2016
